# Supplementary material for: A broadband self-powered photodetector based on NiPS3
Source: Royal Society of Chemistry journal article supplement (doi:10.1039/d3tc03804a), 2023-12-04
Supplement: d3tc03804a1.pdf [file d3tc03804a1.pdf]

## Supporting Information

### Broadband self-powered photodetector based on NiPS<sub>3</sub>

Linghao Zong<sup>1, †</sup>, Jiaming Song<sup>1, 3, 4, †, \*</sup>, Shuxian Wang<sup>1</sup>, Wenhui Chen<sup>1</sup>, Juanjuan Yang<sup>1</sup>, Bingda Li<sup>1</sup>, Peng Hu<sup>1</sup>, Haibo Fan<sup>1</sup>, Feng Teng<sup>1</sup>, Xin Zhao<sup>2</sup>

1. School of Physics, Northwest University, Xi'an 710127, China
2. School of Optoelectronic Engineering, Xi'an Technological University, Xi'an 710021, China
3. Carbon Neutrality College (Yulin), Northwest University, China
4. Shaanxi Key Laboratory for Carbon Neutral Technology, China

†: These authors contributed equally

\*: Corresponding author: [jiaming.song@nwu.edu.cn](mailto:jiaming.song@nwu.edu.cn)



**Fig. S1** White light interferometer measurement of a NiPS<sub>3</sub> flake. The inset shows the optical image of the flake before transferring onto the gold electrodes.

According to the measurement by white light interferometer, the thickness for the NiPS<sub>3</sub> thin film of the device was 180 nm.



**Fig. S2** (a) Zoomed-in I-V curves of Fig. 3b under 365, 425, 515, 635, 700, and 780 nm wavelength light irradiation. (b) I-t curves for 254 nm, 880 nm and 1020 nm wavelengths at -5 V bias.



**Fig. S3** The on/off photoelectric response of a NiPS<sub>3</sub>-based MSM photodetector with asymmetric electrode contacts at 0 V (a) and -5 V (b) bias voltages under 515 nm illumination at different power densities.



**Fig. S4** (a) I-V curves of a symmetrical device under illumination of different light wavelengths. The inset shows a schematic device structure. (b) Zero-bias I-t curves of the symmetric device at different wavelengths.



**Fig. S5** Measured Mott-Schottky curve of NiPS<sub>3</sub>.

The positive slope of the Mott-Schottky curve for NiPS<sub>3</sub> indicates an n-type semiconductor behavior.



**Fig. S6** UPS measurement of NiPS<sub>3</sub>.



**Fig. S7** the UV-vis DRS of NiPS<sub>3</sub>. The inset shows the Tauc plot of the spectrum.

The energy band gap ( $E_g$ ) can be estimated using the conventional Tauc equation:

$$\alpha h\nu = A(h\nu - E_g)^{\frac{n}{2}} \quad (1)$$

where  $\alpha$  is the absorption coefficient,  $h\nu$  is the photon energy,  $A$  is the constant, and  $n = 4$  for an indirectly allowed transition. According to Fig. S7, the optical band gap of NiPS<sub>3</sub> is 1.12 eV.



**Fig. S8** I-t curves (a) and the corresponding calculated responsivity and detectivity (b) for a NiPS<sub>3</sub>-based MSM photodetector with asymmetric electrode contacts at different bias voltages under 425 nm wavelength illumination.

**Table S1** Photoelectric response comparison of self-powered photodetectors

| Photodetector                                                      | $\lambda$<br>(nm) | Bias<br>(V) | R<br>(mA/W)          | D*<br>(Jones)         | $I_{\text{photo}}/I_{\text{dark}}$ | rise/decay<br>time (ms)   | Ref.      |
|--------------------------------------------------------------------|-------------------|-------------|----------------------|-----------------------|------------------------------------|---------------------------|-----------|
| Ba <sub>2</sub> Bi <sub>1.5</sub> Nb <sub>0.5</sub> O <sub>6</sub> | 365~760           | 0           | 0.078                | $1.13 \times 10^8$    | -                                  | -                         | 1         |
| Ga <sub>2</sub> O <sub>3</sub>                                     | 254               | 0           | 0.149                | $3.1 \times 10^9$     | -                                  | 75.9/45.1                 | 2         |
| CsPbBr <sub>3</sub>                                                | 355,500           | 0           | 0.24                 | -                     | -                                  | $6.8 \times 10^{-4}/0.43$ | 3         |
| Cs <sub>2</sub> SnI <sub>6</sub>                                   | white light       | 0           | 1.07                 | $6.03 \times 10^{10}$ | -                                  | -                         | 4         |
| PEDOT:PSS/ $\alpha$ -Ga <sub>2</sub> O <sub>3</sub>                | 245,540           | 0           | 1.43                 | -                     | -                                  | -/537                     | 5         |
| ZnO NRs/PbS/RGO                                                    | 350~700           | 0           | 250                  | $8.3 \times 10^4$     | -                                  | 65/74                     | 6         |
| AgIn <sub>5</sub> Se <sub>8</sub> /FePSe <sub>3</sub>              | 365~1020          | 0           | $3.8 \times 10^{-3}$ | $5.7 \times 10^8$     | 350                                | 20/20                     | 7         |
| NiO/Ga <sub>2</sub> O <sub>3</sub>                                 | 254               | 0           | $5.7 \times 10^{-2}$ | $5.45 \times 10^9$    | 122                                | $340/3.7 \times 10^3$     | 8         |
| NiPS <sub>3</sub>                                                  | 365~780           | 0           | 2.3                  | $6.2 \times 10^9$     | 40                                 | <40/<40                   | This work |

## References

- 1 Z. Y. Dai, C. Chen, G. S. Wang, Y. N. Lyu and N. Ma, *J. Mater. Chem. C*, 2023, **11**, 574-582.

- 2 K. Gu, Z. Zhang, H. Huang, K. Tang, J. Huang, M. Liao and L. Wang, *J. Mater. Chem. C*, 2023, 11, 5371-5377.
- 3 W. Gong, Y. Tian, J. Yan, F. Gao and L. Li, *J. Mater. Chem. C*, 2022, 10, 7460-7468.
- 4 J. Huang, C. Dong, Y. Mei, X. Lu, G. Yue, Y. Gao, R. Liu, W. Zhang and F. Tan, *J. Mater. Chem. C*, 2021, 9, 14217-14225.
- 5 M.-M. Fan, K.-L. Xu, X.-Y. Li, G.-H. He and L. Cao, *J. Mater. Chem. C*, 2021, 9, 16459-16467.
- 6 N. Deka, P. Chakraborty, D. Chandra Patra, S. Dhar and S. P. Mondal, *Mat. Sci. Semicon. Proc.*, 2020, 118, 105165.
- 7 Q. Lu, L. Xu, Y. Ren, J. Gao, Y. Chen, J. Song, H. Fan, F. Teng, X. He and P. Hu, *ACS Appl. Electron. Mater.*, 2022, 4, 5284-5291.
- 8 Y. Wang, C. Wu, D. Guo, P. Li, S. Wang, A. Liu, C. Li, F. Wu and W. Tang, *ACS Appl. Electron. Mater.*, 2020, 2, 2032-2038.”
